# Supplementary material for: Evaluation of effects from hemoglobin variants on HbA1c measurements by different methods
Source: publisher site journal article supplement (doi:10.1515/cclm-2024-0186), 2024-04-02
Supplement: Supplementary file 1 [file j_cclm-2024-0186_suppl_001.docx]

**Supplemental Fig. 1.** Comparison for normal and α-chain variant samples (Hb Q-Thailand, Hb G-Honolulu, and Hb Ube-2) from six methods vs. LC/MS/MS using Passing-Bablok regression. (A) normal samples from Capillarys 3 TERA, QuanTOF, Premier Hb9210, HA-8190Vvr, D-100, and G11 vs LC/MS/MS. (B) α-chain variant samples from Capillarys 3 TERA, QuanTOF, Premier Hb9210, HA-8190Vvr, HA-8190Vst, D-100, and G11 vs. LC/MS/MS.





**Supplemental Fig. 2.** Comparison for β-chain variant samples (Hb New York, Hb J-Bangkok, Hb G-Coushatta, and Hb E) from Capillarys 3 TERA, QuanTOF, Premier Hb9210, HA-8190Vvr, HA-8190Vst, D-100, and G11 vs. LC/MS/MS using Passing-Bablok regression.
